# Supplementary material for: Green Extraction of Pectin from Sugar Beet Flakes and Its Application in Hydrogels and Cryogels
Source: MDPI journal article supplement (doi:10.3390/gels10040228), 2024-03-27
Supplement: s1 [file s1]

## Supplementary Materials

**Table S1.** Box-Behnken design with experimental results and predicted response for conventional citric acid extraction of pectin.

| Run | Independent variables |     |           |        | Experimental results |                | Predicted response |                |
|-----|-----------------------|-----|-----------|--------|----------------------|----------------|--------------------|----------------|
|     | T, °C                 | pH  | SLR, g/mL | t, min | Yield (%)            | GalA (g/100 g) | Yield (%)          | GalA (g/100 g) |
| 1   | 100                   | 1   | 1:15      | 120    | 28.97                | 29.47          | 30.72              | 26.00          |
| 2   | 90                    | 1   | 1:15      | 180    | 26.93                | 71.96          | 26.26              | 67.03          |
| 3   | 90                    | 1.5 | 1:15      | 120    | 19.67                | 60.43          | 19.67              | 60.43          |
| 4   | 90                    | 1.5 | 1:10      | 180    | 10.84                | 82.13          | 8.74               | 86.82          |
| 5   | 100                   | 1.5 | 1:15      | 180    | 18.07                | 70.26          | 18.98              | 70.68          |
| 6   | 90                    | 1.5 | 1:10      | 60     | 8.64                 | 50.51          | 9.78               | 46.39          |
| 7   | 90                    | 1.5 | 1:20      | 180    | 25.78                | 60.62          | 24.62              | 64.60          |
| 8   | 90                    | 2   | 1:20      | 120    | 7.52                 | 90.62          | 6.72               | 91.25          |
| 9   | 90                    | 1   | 1:20      | 120    | 40.10                | 34.11          | 39.11              | 34.39          |
| 10  | 90                    | 2   | 1:10      | 120    | 8.19                 | 63.62          | 9.33               | 64.20          |
| 11  | 80                    | 1   | 1:15      | 120    | 15.79                | 35.31          | 16.31              | 39.89          |
| 12  | 90                    | 2   | 1:15      | 180    | 9.22                 | 84.14          | 10.63              | 80.12          |
| 13  | 80                    | 1.5 | 1:15      | 180    | 7.14                 | 53.88          | 8.75               | 53.75          |
| 14  | 90                    | 1.5 | 1:15      | 120    | 19.67                | 60.43          | 19.67              | 60.43          |
| 15  | 100                   | 1.5 | 1:10      | 120    | 9.11                 | 49.59          | 8.28               | 52.65          |
| 16  | 90                    | 1   | 1:10      | 120    | 12.60                | 58.26          | 13.54              | 58.49          |
| 17  | 80                    | 1.5 | 1:10      | 120    | 5.73                 | 51.76          | 5.43               | 47.32          |
| 18  | 90                    | 1   | 1:15      | 60     | 27.11                | 28.80          | 25.57              | 32.10          |
| 19  | 80                    | 1.5 | 1:20      | 120    | 8.62                 | 50.25          | 9.32               | 46.47          |
| 20  | 90                    | 1.5 | 1:15      | 120    | 19.67                | 60.43          | 19.67              | 60.43          |
| 21  | 80                    | 1.5 | 1:15      | 60     | 5.96                 | 45.84          | 5.19               | 46.29          |
| 22  | 90                    | 1.5 | 1:20      | 60     | 14.78                | 76.39          | 16.86              | 71.56          |
| 23  | 90                    | 1.5 | 1:15      | 120    | 19.67                | 60.43          | 19.67              | 60.43          |
| 24  | 80                    | 2   | 1:15      | 120    | 3.75                 | 46.32          | 1.99               | 49.64          |
| 25  | 90                    | 1.5 | 1:15      | 120    | 19.67                | 60.43          | 19.67              | 60.43          |
| 26  | 90                    | 2   | 1:15      | 60     | 4.07                 | 77.37          | 4.61               | 81.58          |
| 27  | 100                   | 2   | 1:15      | 120    | 8.98                 | 83.55          | 8.45               | 78.82          |
| 28  | 100                   | 1.5 | 1:20      | 120    | 27.18                | 52.72          | 27.35              | 56.44          |
| 29  | 100                   | 1.5 | 1:15      | 60     | 17.29                | 43.66          | 15.83              | 44.66          |

**Table S2.** Box-Behnken design with experimental results and predicted response for microwave-assisted extraction of pectin.

| Run | Independent variables |     |           |      | Experimental results |                | Predicted response |                |
|-----|-----------------------|-----|-----------|------|----------------------|----------------|--------------------|----------------|
|     | P, W                  | pH  | SLR, g/mL | t, s | Yield (%)            | GalA (g/100 g) | Yield (%)          | GalA (g/100 g) |
| 1   | 420                   | 1   | 1:15      | 120  | 8.38                 | 39.34          | 8.36               | 42.03          |
| 2   | 420                   | 2   | 1:20      | 90   | 2.63                 | 57.02          | 2.57               | 59.69          |
| 3   | 420                   | 1.5 | 1:15      | 90   | 4.29                 | 81.93          | 4.29               | 81.93          |
| 4   | 420                   | 1.5 | 1:15      | 90   | 4.29                 | 81.93          | 4.29               | 81.93          |
| 5   | 420                   | 2   | 1:10      | 90   | 2.02                 | 70.47          | 2.12               | 72.53          |
| 6   | 420                   | 1   | 1:20      | 90   | 8.30                 | 33.38          | 8.31               | 31.64          |
| 7   | 560                   | 1.5 | 1:15      | 60   | 3.21                 | 64.22          | 2.97               | 63.93          |
| 8   | 280                   | 1.5 | 1:10      | 90   | 3.24                 | 91.53          | 2.88               | 90.41          |
| 9   | 560                   | 1.5 | 1:20      | 90   | 7.24                 | 60.04          | 7.61               | 60.44          |

|    |     |     |      |     |      |       |      |       |
|----|-----|-----|------|-----|------|-------|------|-------|
| 10 | 560 | 1   | 1:15 | 90  | 6.99 | 48.45 | 6.82 | 50.04 |
| 11 | 420 | 1.5 | 1:15 | 90  | 4.29 | 81.93 | 4.29 | 81.93 |
| 12 | 420 | 1   | 1:15 | 60  | 4.72 | 46.84 | 4.49 | 44.57 |
| 13 | 420 | 1   | 1:10 | 90  | 2.70 | 56.57 | 2.86 | 54.22 |
| 14 | 420 | 2   | 1:15 | 120 | 4.38 | 65.73 | 4.62 | 67.27 |
| 15 | 420 | 2   | 1:15 | 60  | 1.73 | 69.09 | 1.76 | 65.68 |
| 16 | 420 | 1.5 | 1:10 | 60  | 1.95 | 49.38 | 2.15 | 50.56 |
| 17 | 420 | 1.5 | 1:15 | 90  | 4.29 | 81.93 | 4.29 | 81.93 |
| 18 | 560 | 1.5 | 1:10 | 90  | 2.04 | 54.23 | 2.32 | 56.37 |
| 19 | 420 | 1.5 | 1:20 | 120 | 8.77 | 33.15 | 8.46 | 32.37 |
| 20 | 420 | 1.5 | 1:10 | 120 | 5.89 | 77.06 | 5.51 | 75.16 |
| 21 | 280 | 2   | 1:15 | 90  | 1.75 | 86.66 | 1.81 | 85.47 |
| 22 | 560 | 2   | 1:15 | 90  | 2.47 | 70.22 | 2.10 | 68.54 |
| 23 | 420 | 1.5 | 1:20 | 60  | 4.84 | 55.63 | 5.10 | 57.93 |
| 24 | 280 | 1.5 | 1:15 | 120 | 4.22 | 75.10 | 4.56 | 75.71 |
| 25 | 420 | 1.5 | 1:15 | 90  | 4.29 | 81.93 | 4.29 | 81.93 |
| 26 | 280 | 1.5 | 1:15 | 60  | 3.53 | 63.87 | 3.50 | 66.36 |
| 27 | 280 | 1   | 1:15 | 90  | 3.31 | 55.55 | 3.57 | 57.63 |
| 28 | 560 | 1.5 | 1:15 | 120 | 8.50 | 55.79 | 8.63 | 53.62 |
| 29 | 280 | 1.5 | 1:20 | 90  | 3.76 | 53.79 | 3.49 | 50.93 |

**Table S3.** Box-Behnken design with experimental results and predicted response for pulsed ultrasound-assisted extraction of pectin.

| Run | Independent variables |     |           |        | Experimental results |                | Predicted response |                |
|-----|-----------------------|-----|-----------|--------|----------------------|----------------|--------------------|----------------|
|     | A, %                  | pH  | SLR, g/mL | t, min | Yield (%)            | GalA (g/100 g) | Yield (%)          | GalA (g/100 g) |
| 1   | 100                   | 1.5 | 1:15      | 60     | 3.48                 | 55.83          | 3.45               | 56.32          |
| 2   | 80                    | 1.5 | 1:15      | 40     | 3.27                 | 91.61          | 3.28               | 91.61          |
| 3   | 60                    | 1.5 | 1:20      | 40     | 2.85                 | 72.42          | 2.92               | 70.54          |
| 4   | 80                    | 2   | 1:10      | 40     | 1.73                 | 97.44          | 1.81               | 96.95          |
| 5   | 60                    | 2   | 1:15      | 40     | 1.85                 | 89.33          | 1.79               | 89.65          |
| 6   | 100                   | 2   | 1:15      | 40     | 2.22                 | 80.71          | 2.24               | 78.94          |
| 7   | 100                   | 1.5 | 1:15      | 20     | 1.53                 | 62.34          | 1.70               | 60.05          |
| 8   | 80                    | 1.5 | 1:10      | 20     | 2.13                 | 88.83          | 2.08               | 87.06          |
| 9   | 80                    | 1.5 | 1:15      | 40     | 3.28                 | 91.61          | 3.28               | 91.61          |
| 10  | 80                    | 1.5 | 1:15      | 40     | 3.28                 | 91.61          | 3.28               | 91.61          |
| 11  | 60                    | 1   | 1:15      | 40     | 2.67                 | 49.83          | 2.70               | 49.98          |
| 12  | 60                    | 1.5 | 1:10      | 40     | 2.52                 | 70.79          | 2.51               | 70.39          |
| 13  | 60                    | 1.5 | 1:15      | 20     | 1.98                 | 67.16          | 2.06               | 66.68          |
| 14  | 80                    | 1   | 1:15      | 60     | 3.25                 | 57.05          | 3.18               | 55.84          |
| 15  | 80                    | 1.5 | 1:15      | 40     | 3.28                 | 91.61          | 3.28               | 91.61          |
| 16  | 80                    | 1   | 1:15      | 20     | 2.36                 | 40.00          | 2.28               | 40.24          |
| 17  | 80                    | 1   | 1:20      | 40     | 3.33                 | 40.85          | 3.30               | 41.35          |
| 18  | 80                    | 2   | 1:15      | 60     | 2.51                 | 79.16          | 2.48               | 80.54          |
| 19  | 100                   | 1   | 1:15      | 40     | 2.87                 | 40.95          | 2.99               | 39.00          |
| 20  | 60                    | 1.5 | 1:15      | 60     | 2.47                 | 69.09          | 2.36               | 71.39          |
| 21  | 80                    | 2   | 1:15      | 20     | 1.37                 | 92.33          | 1.33               | 95.16          |
| 22  | 80                    | 1.5 | 1:10      | 60     | 2.69                 | 69.03          | 2.83               | 65.93          |
| 23  | 80                    | 1.5 | 1:20      | 60     | 3.66                 | 71.61          | 3.77               | 71.76          |
| 24  | 80                    | 1.5 | 1:20      | 20     | 2.55                 | 48.17          | 2.47               | 49.65          |

|    |     |     |      |    |      |       |      |       |
|----|-----|-----|------|----|------|-------|------|-------|
| 25 | 80  | 1   | 1:10 | 40 | 3.15 | 55.33 | 3.17 | 57.60 |
| 26 | 100 | 1.5 | 1:10 | 40 | 2.80 | 71.98 | 2.62 | 75.48 |
| 27 | 100 | 1.5 | 1:20 | 40 | 3.64 | 41.74 | 3.54 | 43.76 |
| 28 | 80  | 2   | 1:20 | 40 | 2.97 | 83.87 | 3.00 | 81.61 |
| 29 | 80  | 1.5 | 1:15 | 40 | 3.28 | 91.61 | 3.28 | 91.61 |

**Table S4.** ANOVA for yield and galacturonic acid content of pectin from CE.

| Source                                 | Sum of squares | DF | Mean square | F-value | P-value  |
|----------------------------------------|----------------|----|-------------|---------|----------|
| (A) Pectin yield, %                    |                |    |             |         |          |
| Model                                  | 2246.44        | 14 | 160.46      | 65.15   | < 0.0001 |
| Temperature                            | 326.67         | 1  | 326.67      | 132.64  | < 0.0001 |
| pH                                     | 1004.12        | 1  | 1004.12     | 407.72  | < 0.0001 |
| SLR                                    | 395.26         | 1  | 395.26      | 160.49  | < 0.0001 |
| Time                                   | 33.77          | 1  | 33.77       | 13.71   | 0.0024   |
| Temperature × pH                       | 15.80          | 1  | 15.80       | 6.42    | 0.0239   |
| Temperature × SLR                      | 57.61          | 1  | 57.61       | 23.39   | 0.0003   |
| Temperature × time                     | 0.04           | 1  | 0.04        | 0.01    | 0.9004   |
| pH × SLR                               | 198.39         | 1  | 198.39      | 80.55   | < 0.0001 |
| pH × time                              | 7.10           | 1  | 7.10        | 2.88    | 0.1116   |
| SLR × time                             | 19.36          | 1  | 19.36       | 7.86    | 0.0141   |
| $R^2$                                  |                |    | 0.9849      |         |          |
| $Adj-R^2$                              |                |    | 0.9698      |         |          |
| $Pred-R^2$                             |                |    | 0.9129      |         |          |
| (B) Galacturonic acid content, g/100 g |                |    |             |         |          |
| Model                                  | 7344.39        | 14 | 524.60      | 26.90   | < 0.0001 |
| Temperature                            | 175.49         | 1  | 175.49      | 9.00    | 0.0096   |
| pH                                     | 2936.25        | 1  | 2936.25     | 150.56  | < 0.0001 |
| SLR                                    | 6.51           | 1  | 6.51        | 0.33    | 0.5725   |
| Time                                   | 840.35         | 1  | 840.35      | 43.09   | < 0.0001 |
| Temperature × pH                       | 463.76         | 1  | 463.76      | 23.78   | 0.0002   |
| Temperature × SLR                      | 5.38           | 1  | 5.38        | 0.27    | 0.6076   |
| Temperature × time                     | 86.12          | 1  | 86.12       | 4.42    | 0.0542   |
| pH × SLR                               | 654.08         | 1  | 654.08      | 33.54   | < 0.0001 |
| pH × time                              | 331.06         | 1  | 331.06      | 16.98   | 0.001    |
| SLR × time                             | 561.45         | 1  | 561.45      | 28.79   | < 0.0001 |
| $R^2$                                  |                |    | 0.9642      |         |          |
| $Adj-R^2$                              |                |    | 0.9283      |         |          |
| $Pred-R^2$                             |                |    | 0.7935      |         |          |

**Table S5.** ANOVA for yield and galacturonic acid content of pectin from MAE.

| Source              | Sum of squares | DF | Mean square | F-value | P-value  |
|---------------------|----------------|----|-------------|---------|----------|
| (A) Pectin yield, % |                |    |             |         |          |
| Model               | 129.26         | 14 | 9.23        | 97.38   | < 0.0001 |
| Power               | 9.43           | 1  | 9.43        | 99.50   | < 0.0001 |
| pH                  | 31.43          | 1  | 31.43       | 331.47  | < 0.0001 |
| SLR                 | 26.11          | 1  | 26.11       | 275.35  | < 0.0001 |
| Time                | 33.87          | 1  | 33.87       | 357.21  | < 0.0001 |
| Power × pH          | 2.19           | 1  | 2.19        | 23.10   | 0.0003   |

|                                        |         |    |         |        |          |
|----------------------------------------|---------|----|---------|--------|----------|
| Power × SLR                            | 5.48    | 1  | 5.48    | 57.75  | < 0.0001 |
| Power × time                           | 5.29    | 1  | 5.29    | 55.79  | < 0.0001 |
| pH × SLR                               | 6.23    | 1  | 6.23    | 65.65  | < 0.0001 |
| pH × time                              | 0.25    | 1  | 0.25    | 2.69   | 0.1233   |
| SLR × time                             | 0.00    | 1  | 0       | 0.0003 | 0.9873   |
| $R^2$                                  |         |    | 0.9898  |        |          |
| $Adj\text{-}R^2$                       |         |    | 0.9797  |        |          |
| $Pred\text{-}R^2$                      |         |    | 0.9414  |        |          |
| (B) Galacturonic acid content, g/100 g |         |    |         |        |          |
| Model                                  | 6957.88 | 14 | 496.99  | 74.20  | < 0.0001 |
| Power                                  | 450.80  | 1  | 450.80  | 67.31  | < 0.0001 |
| pH                                     | 1611.47 | 1  | 1611.47 | 240.60 | < 0.0001 |
| SLR                                    | 940.40  | 1  | 940.40  | 140.41 | < 0.0001 |
| Time                                   | 0.68    | 1  | 0.68    | 0.10   | 0.7544   |
| Power × pH                             | 21.81   | 1  | 21.81   | 3.26   | 0.0927   |
| Power × SLR                            | 474.15  | 1  | 474.15  | 70.79  | < 0.0001 |
| Power × time                           | 96.63   | 1  | 96.63   | 14.43  | 0.002    |
| pH × SLR                               | 23.72   | 1  | 23.72   | 3.54   | 0.0808   |
| pH × time                              | 4.28    | 1  | 4.28    | 0.63   | 0.4372   |
| SLR × time                             | 629.01  | 1  | 629.01  | 93.91  | < 0.0001 |
| $R^2$                                  |         |    | 0.9867  |        |          |
| $Adj\text{-}R^2$                       |         |    | 0.9734  |        |          |
| $Pred\text{-}R^2$                      |         |    | 0.9234  |        |          |

Table S6. ANOVA for yield and galacturonic acid content of pectin from PUAE.

| Source                                 | Sum of squares | DF | Mean square | F-value | P-value  |
|----------------------------------------|----------------|----|-------------|---------|----------|
| (A) Pectin yield, %                    |                |    |             |         |          |
| Model                                  | 11.06          | 14 | 0.79        | 62.76   | < 0.0001 |
| Amplitude                              | 0.40           | 1  | 0.40        | 32.03   | < 0.0001 |
| pH                                     | 2.07           | 1  | 2.07        | 164.14  | < 0.0001 |
| SLR                                    | 1.32           | 1  | 1.32        | 104.84  | < 0.0001 |
| Time                                   | 3.14           | 1  | 3.14        | 249.51  | < 0.0001 |
| Amplitude × pH                         | 0.007          | 1  | 0.007       | 0.57    | 0.4613   |
| Amplitude × SLR                        | 0.06           | 1  | 0.06        | 5.16    | 0.0393   |
| Amplitude × time                       | 0.53           | 1  | 0.53        | 42.32   | < 0.0001 |
| pH × SLR                               | 0.28           | 1  | 0.28        | 22.31   | 0.0003   |
| pH × time                              | 0.01           | 1  | 0.01        | 1.24    | 0.2841   |
| SLR × time                             | 0.07           | 1  | 0.07        | 6.01    | 0.028    |
| $R^2$                                  |                |    | 0.9843      |         |          |
| $Adj\text{-}R^2$                       |                |    | 0.9686      |         |          |
| $Pred\text{-}R^2$                      |                |    | 0.9097      |         |          |
| (B) Galacturonic acid content, g/100 g |                |    |             |         |          |
| Model                                  | 9551.68        | 14 | 682.26      | 126.99  | < 0.0001 |
| Amplitude                              | 352.84         | 1  | 352.84      | 65.67   | < 0.0001 |
| pH                                     | 4753.31        | 1  | 4753.31     | 884.73  | < 0.0001 |
| SLR                                    | 747.97         | 1  | 747.97      | 139.22  | < 0.0001 |
| Time                                   | 0.72           | 1  | 0.72        | 0.13    | 0.7197   |
| Amplitude × pH                         | 0.01           | 1  | 0.01        | 0.0031  | 0.9561   |
| Amplitude × SLR                        | 253.92         | 1  | 253.92      | 47.26   | < 0.0001 |

---

|                  |        |   |        |       |          |
|------------------|--------|---|--------|-------|----------|
| Amplitude × time | 17.81  | 1 | 17.81  | 3.31  | 0.0901   |
| pH × SLR         | 0.20   | 1 | 0.20   | 0.03  | 0.8472   |
| pH × time        | 228.31 | 1 | 228.31 | 42.50 | < 0.0001 |
| SLR × time       | 467.42 | 1 | 467.42 | 87.00 | < 0.0001 |
| $R^2$            |        |   | 0.9922 |       |          |
| $Adj-R^2$        |        |   | 0.9844 |       |          |
| $Pred-R^2$       |        |   | 0.9550 |       |          |
